# Supplementary material for: Barriers and facilitators to the adoption and implementation of evidence-based injury prevention training programmes: a narrative review
Source: HighWire-hosted journal article supplement (doi:10.1136/bmjsem-2022-001374), 2022-09-01
Supplement: bmjsem-2022-001374supp001_data_supplement.pdf [file bmjsem-2022-001374supp001_data_supplement.pdf]

**Supplemental Table 1.** A representation of the studies that investigated barriers and facilitators of evidence-based injury prevention training programs (listed alphabetically).

| Study             | Study Location | Study Methods                                                                             |                                                                 | Injury Prevention Training Program Description                                                                                                                                                             | Findings on Barriers                                                                                                                                                                                                                                                                                                                                     | Findings on Facilitators |
|-------------------|----------------|-------------------------------------------------------------------------------------------|-----------------------------------------------------------------|------------------------------------------------------------------------------------------------------------------------------------------------------------------------------------------------------------|----------------------------------------------------------------------------------------------------------------------------------------------------------------------------------------------------------------------------------------------------------------------------------------------------------------------------------------------------------|--------------------------|
|                   |                | Study Design & Study Population                                                           | Implementation Evaluation Methods                               |                                                                                                                                                                                                            |                                                                                                                                                                                                                                                                                                                                                          |                          |
| Dix et al. [32]   | United States  | Cross-sectional survey, n=29 coaches.<br><br>NCAA soccer coaches in the NCAA East Region. | Survey-combination of multiple choice and open-ended questions. | No specific injury prevention program was used in this study—the survey sought to understand the attitudes, beliefs, and behaviours of NCAA coaches around injury prevention training programs in general. | <ul style="list-style-type: none"> <li>- Potential cost of the program (i.e., cost of hiring additional staff to administer the program).</li> <li>- Coaches' lack of confidence in knowledge/ability to implement.</li> <li>- Program would be too time-intensive.</li> <li>-Potential lack of staff to assist in administering the program.</li> </ul> | N/A                      |
| Frank et al. [39] | United States  | Qualitative study (pre- and                                                               | Workshop intervention included                                  | The study evaluated the effects of an ACL injury                                                                                                                                                           | <ul style="list-style-type: none"> <li>- Workshop increased coaches' positive attitude</li> </ul>                                                                                                                                                                                                                                                        | N/A                      |

|                   |        |                                                                                                                                                         |                                                            |                                                                                                                                                                                                                                             |                                                                                                                                  |                                                                                           |
|-------------------|--------|---------------------------------------------------------------------------------------------------------------------------------------------------------|------------------------------------------------------------|---------------------------------------------------------------------------------------------------------------------------------------------------------------------------------------------------------------------------------------------|----------------------------------------------------------------------------------------------------------------------------------|-------------------------------------------------------------------------------------------|
|                   |        | <p>post-intervention analysis), n=34 coaches of 15 elite female youth soccer clubs.</p> <p>Athletes on participating teams were under 18 years old.</p> | <p>RE-AIM framework aspects.</p>                           | <p>prevention training program workshop and informational packet on club coaches' behavioural determinants of program implementation. ACL injury prevention training program would take place 2 times per week and last 15-20 minutes.</p>  | <p>and intent to implement the ACL injury prevention training programs (despite intent, adoption rates were still low, 53%).</p> |                                                                                           |
| Haroy et al. [30] | Norway | <p>Cross-sectional survey within a larger RCT, n=408 participants.</p> <p>Sub-elite male football players.</p>                                          | <p>The survey was designed using the RE-AIM framework.</p> | <p>"Adductor Strengthening Programme:" designed to prevent groin-specific injuries among football players. The intervention was included in the regular warm-up routine 2-3 times per week during 6 weeks of pre-season and 1x per week</p> | <p>- Program was too time-intensive.</p>                                                                                         | <p>- Knowledge of injury risk and the need for proactive injury prevention exercises.</p> |

|                       |           |                                                                                                                                 |                                                                                                    |                                                                                          |                                                                                                                            |                                                                                                                                                                                                                                              |
|-----------------------|-----------|---------------------------------------------------------------------------------------------------------------------------------|----------------------------------------------------------------------------------------------------|------------------------------------------------------------------------------------------|----------------------------------------------------------------------------------------------------------------------------|----------------------------------------------------------------------------------------------------------------------------------------------------------------------------------------------------------------------------------------------|
|                       |           |                                                                                                                                 |                                                                                                    | during the regular season.<br>Athletes reported completing the program within 5 minutes. |                                                                                                                            |                                                                                                                                                                                                                                              |
| Mawson et al. [33]    | Canada    | Cross-sectional survey, n=101 coaches.<br><br>Youth soccer team coaches.                                                        | The survey was designed using the RE-AIM framework.                                                | No specific injury prevention program was used in this study.                            | - Coaches' lack of confidence in knowledge/ability to implement.<br><br>- Perceived time required to complete the program. | N/A                                                                                                                                                                                                                                          |
| McGlashan et al. [27] | Australia | Qualitative case study, n=3 community-level Australian Football coaches.<br><br>Coaches of adult male sub-elite football teams. | Qualitative analysis of coaches' perceived strategies to promote injury prevention implementation. | No specific injury prevention program was used in this study.                            | N/A                                                                                                                        | - Coaches are aware of the empirical data supporting the program's efficacy.<br><br>- Emphasis on collaboration between key stakeholders (coaches and players).<br><br>- Commitment from players encourages coaches to continue the program. |

|                      |           |                                                                  |                                                                                                                   |                                                                                                                                                                                               |                                                                                                                                                                                                                                                    |                                                                                                                                                                                                                                                                                                      |
|----------------------|-----------|------------------------------------------------------------------|-------------------------------------------------------------------------------------------------------------------|-----------------------------------------------------------------------------------------------------------------------------------------------------------------------------------------------|----------------------------------------------------------------------------------------------------------------------------------------------------------------------------------------------------------------------------------------------------|------------------------------------------------------------------------------------------------------------------------------------------------------------------------------------------------------------------------------------------------------------------------------------------------------|
| O'Brien & Finch [40] | N/A       | Systematic Review, n=52 trials.<br><br>Team ball sport athletes. | Included literature evaluated programs using the RE-AIM framework                                                 | Injury prevention training programs included in the review required structured exercise programs to prevent musculoskeletal injuries.                                                         | <ul style="list-style-type: none"> <li>- Coaches feel satisfied with their current routine.</li> <li>- Coaches do not place importance on injury prevention needs.</li> <li>- Coaches feel sceptical about the program's effectiveness.</li> </ul> | <ul style="list-style-type: none"> <li>- Regular contact and interaction with researchers.</li> <li>- Program easily integrated into practice.</li> <li>- Educational materials designed for coaches.</li> <li>- Program had variation and allowed for progression throughout the season.</li> </ul> |
| Richmond et al.[34]  | Canada    | 9 focus groups, 4 interviews.<br><br>11-15-year-old athletes.    | Focus group discussions and interviews with stakeholders (including school principals, PE teachers, and students) | "iSprint:" an evidence-based neuromuscular training program, decreased the rate of sports-related injuries by 70%. The program is designed to take 15-minutes as part of the warm-up routine. | <ul style="list-style-type: none"> <li>- Program was too time-intensive.</li> <li>- Difficult/confusing exercises.</li> <li>- Perceived lack of knowledge to implement program correctly.</li> </ul>                                               | N/A                                                                                                                                                                                                                                                                                                  |
| Saunders et al. [28] | Australia | Qualitative study within a larger RCT,                           | RE-AIM framework to evaluate an end-of-season survey                                                              | "Down to Earth" (D2E) [40]: a netball-specific 6-week, 10-15 minute program                                                                                                                   | <ul style="list-style-type: none"> <li>- Program was too time-intensive.</li> <li>- Difficulty of the exercises</li> </ul>                                                                                                                         | N/A                                                                                                                                                                                                                                                                                                  |

|                                                                                                                                         |  |                                                                                                |                          |                                                                                                         |                                                                                                                                            |  |
|-----------------------------------------------------------------------------------------------------------------------------------------|--|------------------------------------------------------------------------------------------------|--------------------------|---------------------------------------------------------------------------------------------------------|--------------------------------------------------------------------------------------------------------------------------------------------|--|
|                                                                                                                                         |  | n=31 coaches from 31 different teams.<br><br>Community-level netball teams up to 15 years old. | completed by 24 coaches. | developed to specifically prevent lower-limb injuries. Included a 1hr educational workshop for coaches. | - Lack of motivation from athletes to complete the program.<br><br>- Difficult for athletes to complete the program if they miss practice. |  |
| Abbreviation: RE-AIM framework = reach, effectiveness, adoption, implementation, maintenance framework; RCT = randomized clinical trial |  |                                                                                                |                          |                                                                                                         |                                                                                                                                            |  |
