# Supplementary material for: Barriers and facilitators to the adoption and implementation of evidence-based injury prevention training programmes: a narrative review
Source: HighWire-hosted journal article supplement (doi:10.1136/bmjsem-2022-001374), 2022-09-01
Supplement: bmjsem-2022-001374supp002_data_supplement.pdf [file bmjsem-2022-001374supp002_data_supplement.pdf]

**Supplemental Table 2.** Quality assessment of qualitative studies [25].

| <b>Author</b>        | <b>Clear statement of, and rationale for, research question</b> | <b>Study thoroughly contextualized by existing literature</b> | <b>Method/design apparent, and consistent with research intent</b> | <b>Data collection strategy apparent and appropriate</b>        | <b>Sample and sampling method appropriate</b> | <b>Analytic approach appropriate</b> | <b>Context described and taken account of in interpretation</b> |
|----------------------|-----------------------------------------------------------------|---------------------------------------------------------------|--------------------------------------------------------------------|-----------------------------------------------------------------|-----------------------------------------------|--------------------------------------|-----------------------------------------------------------------|
| Dix et al. [32]      | Yes                                                             | Yes                                                           | Yes                                                                | Yes                                                             | Yes                                           | Yes                                  | Yes                                                             |
| Frank et al. [39]    | Yes                                                             | Yes                                                           | Yes                                                                | Yes                                                             | Yes                                           | Yes                                  | Yes                                                             |
| Haroy et al. [30]    | Yes                                                             | Yes                                                           | Yes                                                                | Yes                                                             | Yes                                           | Yes                                  | Yes                                                             |
| Mawson et al. [33]   | Yes                                                             | Yes                                                           | Yes                                                                | Yes                                                             | Yes                                           | Yes                                  | Yes                                                             |
| McGlashan et al.[27] | Yes                                                             | Yes                                                           | Yes                                                                | Items included in semi-structured interview were not described. | Yes                                           | Yes                                  | Yes                                                             |
| Richmond et al. [34] | Yes                                                             | Yes                                                           | Yes                                                                | Yes                                                             | Yes                                           | Yes                                  | Yes                                                             |
| Saunders et al. [28] | Yes                                                             | Yes                                                           | Yes                                                                | Yes                                                             | Yes                                           | Yes                                  | Yes                                                             |
